# Supplementary material for: The role of fluocerite in the genesis of bastnäsite: mechanistic insights and transformation pathways
Source: Royal Society of Chemistry journal article supplement (doi:10.1039/d4nr01614a), 2024-01-01
Supplement: d4nr01614a1.pdf [file d4nr01614a1.pdf]

## SUPPORTING INFORMATION FOR THE PAPER

### **The role of fluocerite in the genesis of bastnasite: mechanistic insights into the fluorite-fluocerite-bastnasite transformation.**

Luca Terribili<sup>a\*</sup>, Remi Rateau<sup>a</sup>, Melanie Maddin<sup>a</sup>, Juan Diego Rodriguez-Blanco<sup>a,b</sup>.

\* [terribil@tcd.ie](mailto:terribil@tcd.ie)

<sup>a</sup> Department of Geology, School of Natural Sciences, Trinity College Dublin, College green, Dublin D02PN40, Ireland

<sup>b</sup> iCRAG, Department of Geology, School of Natural Sciences, Trinity College Dublin, College green, Dublin D02PN40, Ireland

**Fig. SI-1** Selected examples of Rietveld refinement containing (a) fluorite and fluocerite in the Nd experiment at 70 °C after 10 hours, (b) fluocerite and bastnäsite in the La experiment at 200 °C after 60 days, (c) fluocerite, bastnäsite and cerianite in the Ce experiment at 200 °C after 2 days.

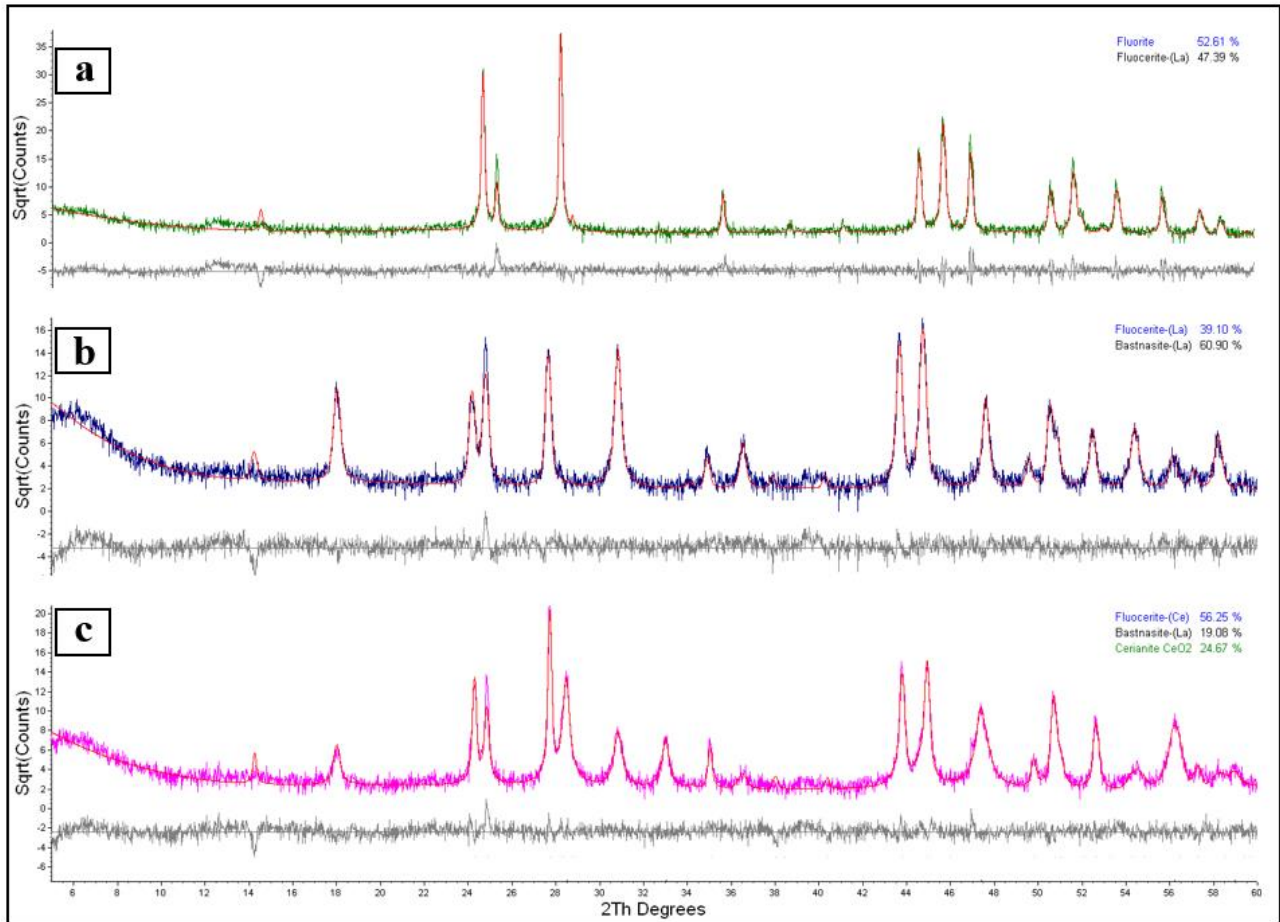

Fig. SI-2. Typical crystal morphologies of fluocerite obtained in our experiments.

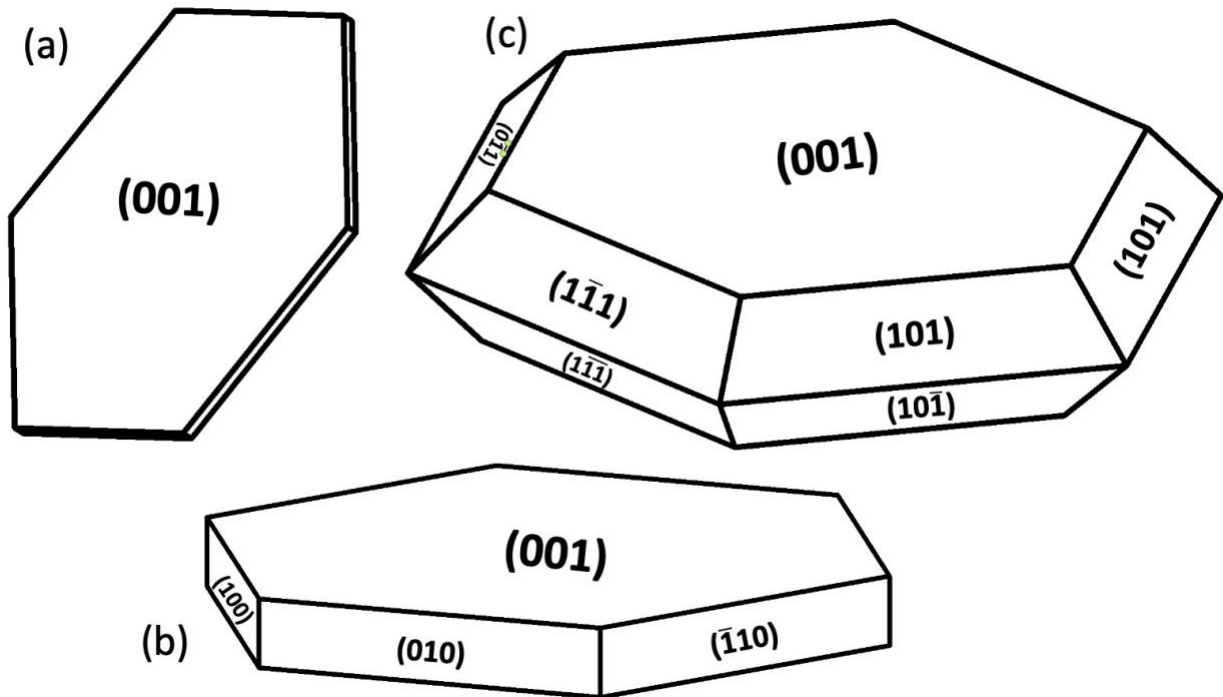

**Fig. SI-3.** Fluocerite crystals showing (a) rounded morphologies at early stage of reaction at 50 °C in the La system, (b) pseudo-hexagonal morphologies after 9.5 hr of reaction at 70 °C in the Ce system and (c) well-developed hexagonal shape at 90 °C in the Nd system after 24 hr of reaction.

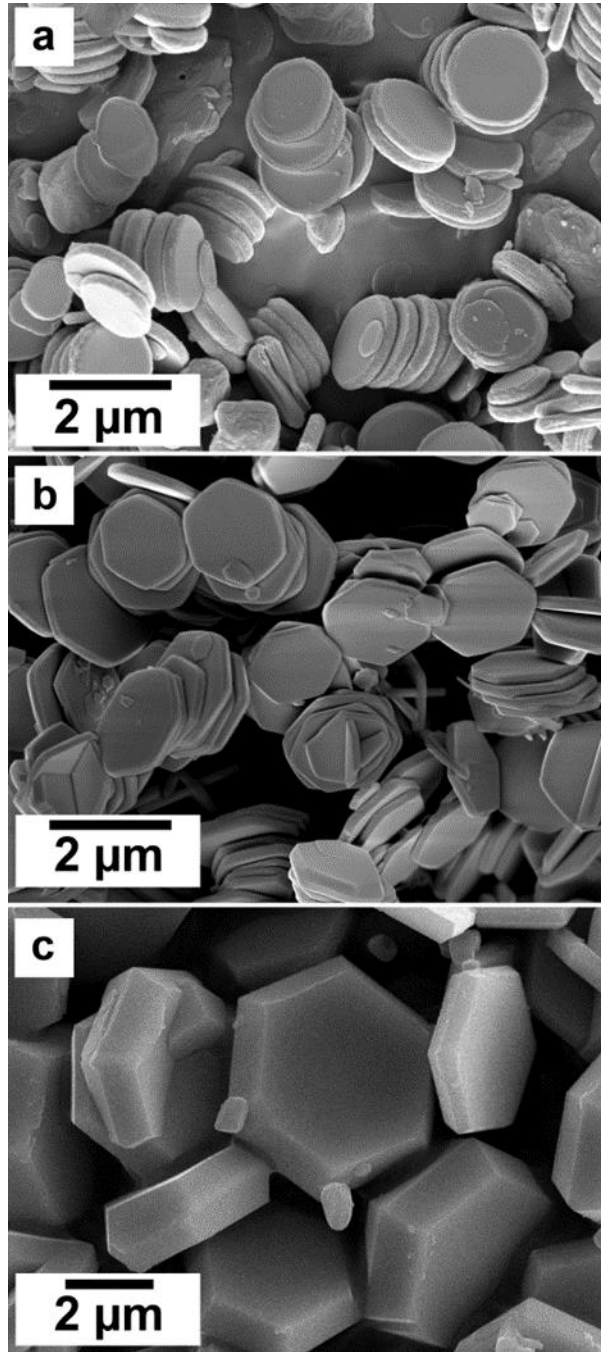

**Fig. SI-4.** Avrami plots for the fluorite to fluocerite transformation experiments in the presence of (a) La, (b) Ce and (c) Nd.

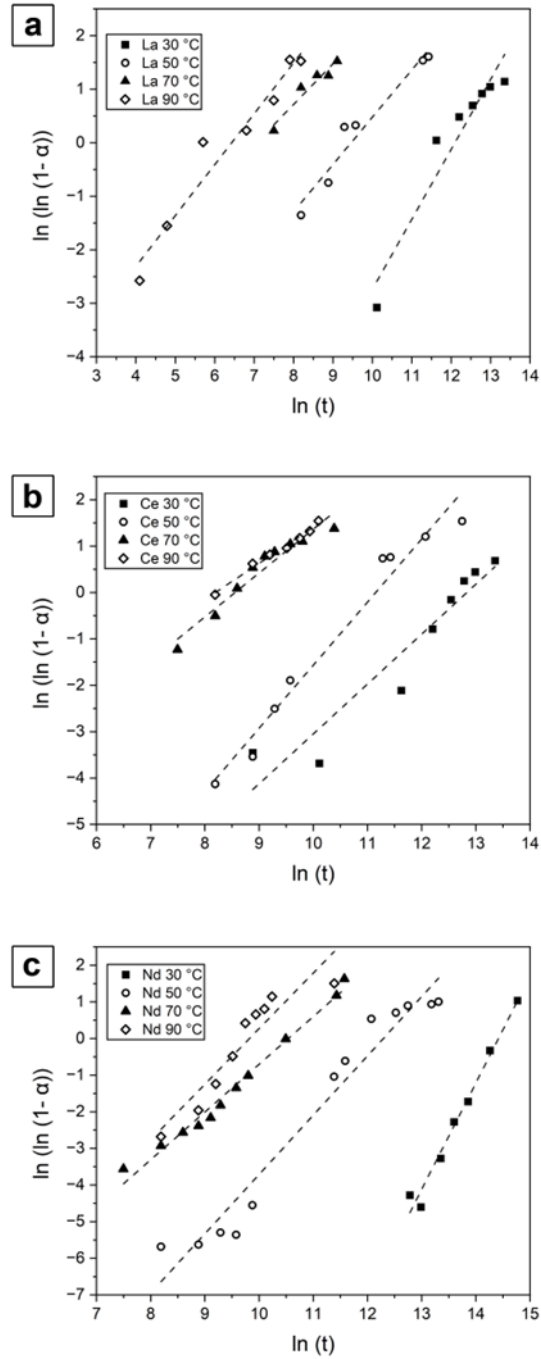

**Table SI-1.** Unit cell parameters of fluorite and of the solid phases obtained during the fluorite to fluocerite transformation experiments and fluocerite carbonation experiments in the La system.

| Fluorite | T (°C)            | Unit-cell parameters |                            |                            | RWP   | GOF  |
|----------|-------------------|----------------------|----------------------------|----------------------------|-------|------|
|          |                   | a (Å)                | Cell Vol (Å <sup>3</sup> ) |                            |       |      |
|          | 90                | 5.460(33)            | 162.8(23)                  |                            | 19.02 | 2.11 |
| La       | <b>Fluocerite</b> |                      |                            |                            |       |      |
|          | T (°C)            | Unit-cell parameters |                            |                            | RWP   | GOF  |
|          |                   | a (Å)                | c (Å)                      | Cell Vol (Å <sup>3</sup> ) |       |      |
|          | 30                | 7.156(11)            | 7.336(11)                  | 325.4(11)                  | 19.45 | 1.57 |
|          | 50                | 7.158(71)            | 7.331(75)                  | 325.4(72)                  | 18.32 | 1.49 |
|          | 70                | 7.165(65)            | 7.334(69)                  | 326.1(67)                  | 18.81 | 1.71 |
|          | 90                | 7.180(24)            | 7.355(26)                  | 328.4(25)                  | 16.27 | 1.42 |
|          | <b>Bastnäsité</b> |                      |                            |                            |       |      |
|          | T (°C)            | Unit-cell parameters |                            |                            | RWP   | GOF  |
|          |                   | a (Å)                | c (Å)                      | Cell Vol (Å <sup>3</sup> ) |       |      |
|          | 50                | 7.199(61)            | 9.856(47)                  | 221.2(43)                  | 20.82 | 1.32 |
|          | 90                | 7.213(33)            | 9.864(26)                  | 222.19(24)                 | 22.86 | 1.47 |
|          | 200               | 7.173(55)            | 9.828(40)                  | 218.9(38)                  | 26.60 | 1.19 |

**Table SI-2.** Unit cell parameters of the solid phases obtained during the fluorite to fluocerite transformation experiments and fluocerite carbonation experiments in the Ce system.

|           |                   | <b>Fluocerite</b> |                             |              |                                 |            |            |
|-----------|-------------------|-------------------|-----------------------------|--------------|---------------------------------|------------|------------|
|           |                   | <b>T (°C)</b>     | <b>Unit-cell parameters</b> |              |                                 | <b>RWP</b> | <b>GOF</b> |
|           |                   |                   | <b>a (Å)</b>                | <b>c (Å)</b> | <b>Cell Vol (Å<sup>3</sup>)</b> |            |            |
| <b>Ce</b> | <b>30</b>         | 7.1091(28)        | 7.270(31)                   | 318.2(29)    | 18.88                           | 1.49       |            |
|           | <b>50</b>         | 7.117(30)         | 7.277(30)                   | 319.2(30)    | 14.4                            | 1.70       |            |
|           | <b>70</b>         | 7.108(18)         | 7.277(17)                   | 318.4(18)    | 18.78                           | 1.43       |            |
|           | <b>90</b>         | 7.104(13)         | 7.277(13)                   | 318.1(13)    | 17.85                           | 1.42       |            |
|           | <b>Bastnäsite</b> |                   |                             |              |                                 |            |            |
|           |                   |                   | <b>Unit-cell parameters</b> |              |                                 | <b>RWP</b> | <b>GOF</b> |
|           |                   |                   | <b>a (Å)</b>                | <b>c (Å)</b> | <b>Cell Vol (Å<sup>3</sup>)</b> |            |            |
|           |                   | <b>50</b>         | 7.115(40)                   | 9.788(41)    | 214.6(30)                       | 19.16      | 1.28       |
|           |                   | <b>90</b>         | 7.119(36)                   | 9.808(20)    | 215.3(23)                       | 20.95      | 1.41       |
|           |                   | <b>200</b>        | 7.165(50)                   | 9.828(39)    | 218.4(35)                       | 24.78      | 1.15       |
|           | <b>Cerianite</b>  |                   |                             |              |                                 |            |            |
|           |                   |                   | <b>Unit-cell parameters</b> |              |                                 | <b>RWP</b> | <b>GOF</b> |
|           |                   |                   | <b>a (Å)</b>                |              | <b>Cell Vol (Å<sup>3</sup>)</b> |            |            |
|           | <b>50</b>         | 5.422(20)         |                             | 159.4(23)    | 19.16                           | 1.28       |            |
|           | <b>90</b>         | 5.415(34)         |                             | 158.8(30)    | 20.95                           | 1.41       |            |
|           | <b>200</b>        | 5.421(36)         |                             | 159.3(32)    | 24.78                           | 1.15       |            |

**Table SI-3.** Unit cell parameters of the solid phases obtained during the fluorite to fluocerite transformation experiments and fluocerite carbonation experiments in the Nd system.

| Nd      | Fluocerite           |                      |           |                            |       |                            |
|---------|----------------------|----------------------|-----------|----------------------------|-------|----------------------------|
|         | T (°C)               | Unit-cell parameters |           |                            | RWP   | GOF                        |
|         |                      | a (Å)                | c (Å)     | Cell Vol (Å <sup>3</sup> ) |       |                            |
|         | 30                   | 7.018(30)            | 7.205(29) | 307.4(29)                  | 20.59 | 2.02                       |
|         | 50                   | 7.015(17)            | 7.192(17) | 306.6(17)                  | 17.25 | 1.40                       |
|         | 70                   | 7.018(25)            | 7.195(27) | 306.9(25)                  | 19.63 | 1.44                       |
|         | 90                   | 7.012(18)            | 7.192(19) | 306.3(18)                  | 19.00 | 1.36                       |
|         | Bastnäsite           |                      |           |                            |       |                            |
|         | T (°C)               | Unit-cell parameters |           |                            | RWP   | GOF                        |
|         |                      | a (Å)                | c (Å)     | Cell Vol (Å <sup>3</sup> ) |       |                            |
| 50      | 7.080(47)            | 9.742(36)            | 211.5(32) | 24.88                      | 1.29  |                            |
| 90      | 7.029(38)            | 9.891(23)            | 211.6(25) | 24.53                      | 1.60  |                            |
| 200     | 7.082(11)            | 9.814(82)            | 213.2(78) | 24.76                      | 1.76  |                            |
| Kozoite |                      |                      |           |                            |       |                            |
| T (°C)  | Unit-cell parameters |                      |           | RWP                        | GOF   |                            |
|         | a (Å)                | b (Å)                | c (Å)     |                            |       | Cell Vol (Å <sup>3</sup> ) |
| 50      | 7.155(39)            | 4.955(28)            | 8.443(50) | 24.88                      | 1.29  |                            |
| 90      | 7.132(48)            | 4.953(32)            | 8.425(11) | 24.53                      | 1.60  |                            |
| 200     | 7.211(13)            | 4.962(77)            | 8.357(18) | 24.76                      | 1.76  |                            |



**Table SI-4.** Quantification of crystalline phases during the fluorite to La-fluocerite transformation reactions.

| <b>La</b>     |                 |                     |                       |
|---------------|-----------------|---------------------|-----------------------|
| <b>T (°C)</b> | <b>Time (h)</b> | <b>Fluorite wt%</b> | <b>Fluocerite wt%</b> |
| <b>30</b>     | 0.00            | 100                 | 0                     |
|               | 6.83            | 96                  | 4                     |
|               | 31.00           | 35                  | 65                    |
|               | 55.25           | 20                  | 80                    |
|               | 77.75           | 13                  | 87                    |
|               | 98.83           | 8                   | 92                    |
|               | 121.16          | 6                   | 94                    |
|               | 174.92          | 4                   | 96                    |
| <b>50</b>     | 0.00            | 100                 | 0                     |
|               | 1.00            | 77                  | 23                    |
|               | 2.00            | 65                  | 35                    |
|               | 2.00            | 62                  | 38                    |
|               | 3.00            | 26                  | 74                    |
|               | 4.00            | 25                  | 75                    |
|               | 4.00            | 24                  | 76                    |
|               | 22.00           | 2                   | 98                    |
|               | 25.42           | 0                   | 100                   |
| <b>70</b>     | 0.00            | 100                 | 0                     |
|               | 0.50            | 29                  | 71                    |
|               | 1.00            | 6                   | 94                    |
|               | 1.50            | 3                   | 97                    |
|               | 2.50            | 2                   | 98                    |
|               | 4.00            | 0                   | 100                   |
| <b>90</b>     | 0.00            | 100                 | 0                     |
|               | 0.02            | 93                  | 7                     |
|               | 0.03            | 81                  | 19                    |
|               | 0.08            | 36                  | 64                    |
|               | 0.25            | 28                  | 72                    |
|               | 0.50            | 11                  | 89                    |
|               | 0.75            | 1                   | 99                    |
|               | 1.00            | 0                   | 100                   |

**Table SI-5.** Quantification of crystalline phases during the fluorite to Ce-fluocerite transformation reactions.

| <b>Ce</b>     |                 |                     |                       |
|---------------|-----------------|---------------------|-----------------------|
| <b>T (°C)</b> | <b>Time (h)</b> | <b>Fluorite wt%</b> | <b>Fluocerite wt%</b> |
| <b>30</b>     | 0.00            | 100                 | 0                     |
|               | 6.83            | 98                  | 2                     |
|               | 31.00           | 89                  | 11                    |
|               | 55.25           | 63                  | 37                    |
|               | 77.75           | 42                  | 58                    |
|               | 98.83           | 27                  | 73                    |
|               | 121.16          | 21                  | 79                    |
|               | 174.92          | 14                  | 86                    |
| <b>50</b>     | 0.00            | 100                 | 0                     |
|               | 1.00            | 98                  | 2                     |
|               | 2.00            | 97                  | 3                     |
|               | 3.00            | 92                  | 8                     |
|               | 4.00            | 86                  | 14                    |
|               | 22.00           | 12                  | 88                    |
|               | 48.50           | 4                   | 96                    |
|               | 95.25           | 0                   | 100                   |
| <b>70</b>     | 0.00            | 100                 | 0                     |
|               | 0.50            | 75                  | 25                    |
|               | 1.00            | 55                  | 45                    |
|               | 1.50            | 34                  | 66                    |
|               | 2.00            | 18                  | 82                    |
|               | 2.50            | 11                  | 89                    |
|               | 3.00            | 9                   | 91                    |
|               | 4.00            | 6                   | 94                    |
|               | 5.00            | 5                   | 95                    |
|               | 9.00            | 2                   | 98                    |
| <b>90</b>     | 0.00            | 100                 | 0                     |
|               | 1.00            | 38                  | 62                    |
|               | 2.00            | 15                  | 85                    |
|               | 2.75            | 10                  | 90                    |
|               | 3.75            | 7                   | 93                    |
|               | 4.75            | 4                   | 96                    |
|               | 5.75            | 2                   | 98                    |
|               | 6.75            | 1                   | 99                    |
|               | 7.75            | 0                   | 100                   |

**Table SI-6.** Quantification of crystalline phases during the fluorite to Nd-fluocerite transformation reactions.

| <b>Nd</b>     |                 |                     |                       |
|---------------|-----------------|---------------------|-----------------------|
| <b>T (°C)</b> | <b>Time (h)</b> | <b>Fluorite wt%</b> | <b>Fluocerite wt%</b> |
| <b>30</b>     | 0.00            | 100                 | 0                     |
|               | 98.83           | 99                  | 1                     |
|               | 121.16          | 99                  | 1                     |
|               | 174.92          | 96                  | 4                     |
|               | 223.67          | 90                  | 10                    |
|               | 288.92          | 84                  | 16                    |
|               | 433.00          | 49                  | 51                    |
|               | 720.75          | 6                   | 94                    |
| <b>50</b>     | 0.00            | 100                 | 0                     |
|               | 4.00            | 99                  | 1                     |
|               | 5.41            | 99                  | 1                     |
|               | 24.42           | 70                  | 30                    |
|               | 29.92           | 58                  | 42                    |
|               | 48.50           | 18                  | 82                    |
|               | 76.33           | 13                  | 87                    |
|               | 95.25           | 9                   | 91                    |
|               | 147.17          | 8                   | 92                    |
|               | 167.75          | 7                   | 93                    |
| <b>70</b>     | 0.00            | 100                 | 0                     |
|               | 0.50            | 97                  | 3                     |
|               | 1.00            | 95                  | 5                     |
|               | 1.50            | 93                  | 7                     |
|               | 2.00            | 91                  | 9                     |
|               | 2.50            | 89                  | 11                    |
|               | 3.00            | 85                  | 15                    |
|               | 4.00            | 77                  | 23                    |
|               | 5.00            | 69                  | 31                    |
|               | 10.00           | 37                  | 63                    |
|               | 25.50           | 4                   | 96                    |
|               | 29.50           | 0                   | 100                   |
|               | <b>90</b>       | 0.00                | 100                   |
| 1.00          |                 | 93                  | 7                     |
| 2.00          |                 | 87                  | 13                    |
| 2.75          |                 | 75                  | 25                    |
| 3.75          |                 | 54                  | 46                    |
| 4.75          |                 | 22                  | 78                    |
| 5.75          |                 | 14                  | 86                    |
| 6.75          |                 | 11                  | 89                    |
| 7.75          |                 | 4                   | 96                    |
| 24.50         |                 | 0                   | 100                   |

**Table SI-7.** Point analysis obtained with SEM-EDS on La-, Ce- and Nd-fluocerite final samples obtained at 90 ° C.

| Point of analysis | Atomic % |         |           |        |           |       |
|-------------------|----------|---------|-----------|--------|-----------|-------|
|                   | Fluorine | Calcium | Lanthanum | Cerium | Neodymium | Total |
| 1                 | 74.16    | 4.97    | 20.87     | /      | /         | 100   |
| 2                 | 74.63    | 4.66    | 20.71     | /      | /         | 100   |
| 3                 | 71.88    | 5.17    | 22.95     | /      | /         | 100   |
| 4                 | 75.05    | 4.71    | 20.24     | /      | /         | 100   |
| 5                 | 69.39    | 5.94    | 24.67     | /      | /         | 100   |
| 1                 | 75.62    | 2.68    | /         | 21.71  | /         | 100   |
| 2                 | 73.91    | 2.85    | /         | 23.24  | /         | 100   |
| 3                 | 72.23    | 2.11    | /         | 25.65  | /         | 100   |
| 4                 | 73.94    | 2.97    | /         | 23.09  | /         | 100   |
| 5                 | 74.11    | 2.92    | /         | 22.97  | /         | 100   |
| 1                 | 72.91    | 2.21    | /         | /      | 24.88     | 100   |
| 2                 | 72.97    | 1.89    | /         | /      | 25.15     | 100   |
| 3                 | 72.81    | 2.36    | /         | /      | 24.83     | 100   |
| 4                 | 73.7     | 1.39    | /         | /      | 24.91     | 100   |
| 5                 | 73.76    | 1.42    | /         | /      | 24.83     | 100   |

**Table SI-8.** Point analysis obtained with SEM-EDS on La-, Ce- and Nd-bastnasite final samples obtained at 90 ° C.

| Point of analysis | Atomic % |        |          |         |           |        |           |       |
|-------------------|----------|--------|----------|---------|-----------|--------|-----------|-------|
|                   | Carbon   | Oxygen | Fluorine | Calcium | Lanthanum | Cerium | Neodymium | Total |
| 1                 | 31.34    | 15.02  | 29.37    | 1.77    | 22.51     | /      | /         | 100   |
| 2                 | 28.92    | 17.5   | 26.49    | 0.92    | 26.17     | /      | /         | 100   |
| 3                 | 27.63    | 20     | 18.96    | 1.68    | 31.73     | /      | /         | 100   |
| 4                 | 41.11    | 20.32  | 19.69    | 0.89    | 18        | /      | /         | 100   |
| 1                 | 38.48    | 28.61  | 12.4     | 1.55    | /         | 18.96  | /         | 100   |
| 2                 | 36.96    | 20.06  | 24.22    | 1.16    | /         | 17.6   | /         | 100   |
| 3                 | 28.63    | 24.07  | 16.79    | 3.31    | /         | 27.2   | /         | 100   |
| 4                 | 37.3     | 15.67  | 30.56    | 0.9     | /         | 15.58  | /         | 100   |
| 1                 | 35.95    | 12.12  | 27.12    | 1.11    | /         | /      | 23.71     | 100   |
| 2                 | 32.74    | 2.48   | 34.08    | 1.36    | /         | /      | 29.33     | 100   |
| 3                 | 33.04    | 26.52  | 18.58    | 1.18    | /         | /      | 20.68     | 100   |
| 4                 | 27.52    | 21.64  | 28.3     | 0.83    | /         | /      | 21.71     | 100   |

**Table SI-9.** Quantification of crystalline phases during the La-fluocerite to La-bastnasite transformation reactions.

| <b>La</b>     |                    |                       |                       |
|---------------|--------------------|-----------------------|-----------------------|
| <b>T (°C)</b> | <b>Time (days)</b> | <b>Fluocerite wt%</b> | <b>Bastnasite wt%</b> |
| <b>0</b>      | 0                  | 100                   | 0                     |
|               | 1                  | 95                    | 5                     |
|               | 3                  | 63                    | 37                    |
|               | 5                  | 48                    | 52                    |
|               | 7                  | 46                    | 54                    |
|               | 14                 | 26                    | 74                    |
|               | 24                 | 16                    | 84                    |
| <b>90</b>     | 0                  | 100                   | 0                     |
|               | 1                  | 83                    | 17                    |
|               | 2                  | 81                    | 19                    |
|               | 5                  | 81                    | 19                    |
|               | 7                  | 80                    | 20                    |
|               | 16                 | 83                    | 17                    |
|               | 23                 | 81                    | 19                    |
|               | 33                 | 79                    | 21                    |
| <b>200</b>    | 0                  | 100                   | 0                     |
|               | 0.2                | 77                    | 23                    |
|               | 1                  | 65                    | 35                    |
|               | 2                  | 64                    | 36                    |
|               | 6                  | 65                    | 35                    |
|               | 60                 | 42                    | 58                    |

**Table SI-10.** Quantification of crystalline phases during the Ce-fluocerite to Ce-bastnasite and cerianite transformation reactions.

| Ce         |             |                |                |               |
|------------|-------------|----------------|----------------|---------------|
| T (°C)     | Time (days) | Fluocerite wt% | Bastnasite wt% | Cerianite wt% |
| <b>50</b>  | 0           | 100            | 0              | 0             |
|            | 1           | 98             | <1             | 2             |
|            | 3           | 77             | 10             | 13            |
|            | 5           | 72             | 10             | 18            |
|            | 7           | 65             | 11             | 24            |
|            | 14          | 56             | 15             | 29            |
|            | 24          | 50             | 12             | 38            |
| <b>90</b>  | 0           | 100            | 0              | 0             |
|            | 1           | 88             | 1              | 11            |
|            | 3           | 77             | 0              | 23            |
|            | 5           | 76             | 2              | 22            |
|            | 7           | 58             | 2              | 40            |
|            | 14          | 50             | 5              | 45            |
|            | 24          | 27             | 8              | 65            |
| <b>200</b> | 0           | 100            | 0              | 0             |
|            | 0.2         | 81             | 8              | 11            |
|            | 1           | 57             | 20             | 23            |
|            | 2           | 50             | 17             | 33            |
|            | 6           | 63             | 29             | 8             |
|            | 60          | 62             | 17             | 21            |

**Table SI-11.** Quantification of crystalline phases during the Nd-fluocerite to Nd-bastnasite and Nd-kozoite transformation reactions.

| <b>Nd</b>     |                    |                       |                       |                    |
|---------------|--------------------|-----------------------|-----------------------|--------------------|
| <b>T (°C)</b> | <b>Time (days)</b> | <b>Fluocerite wt%</b> | <b>Bastnasite wt%</b> | <b>Kozoite wt%</b> |
| <b>50</b>     | 0                  | 100                   | 0                     | 0                  |
|               | 1                  | 99                    | 1                     | 0                  |
|               | 3                  | 99                    | 1                     | <1                 |
|               | 5                  | 98                    | 2                     | <1                 |
|               | 7                  | 92                    | 4                     | 4                  |
|               | 14                 | 80                    | 11                    | 9                  |
|               | 24                 | 71                    | 19                    | 10                 |
| <b>90</b>     | 0                  | 100                   | 0                     | 0                  |
|               | 1                  | 96                    | <1                    | 4                  |
|               | 2                  | 91                    | <1                    | 9                  |
|               | 5                  | 94                    | <1                    | 6                  |
|               | 7                  | 96                    | <1                    | 4                  |
|               | 16                 | 97                    | <1                    | 3                  |
|               | 23                 | 96                    | 1                     | 3                  |
|               | 33                 | 96                    | 3                     | 1                  |
| <b>200</b>    | 0                  | 100                   | 0                     | 0                  |
|               | 0.2                | 86                    | 11                    | 3                  |
|               | 1                  | 70                    | 20                    | 10                 |
|               | 2                  | 66                    | 22                    | 12                 |
|               | 6                  | 74                    | 26                    | <1                 |
